# Supplementary material for: “It’s about time they taught us”: a qualitative study evaluating the barriers to finding and screening child contacts under five at risk for TB in Gauteng Province, South Africa from the provider and caregiver perspectives
Source: Springer Nature journal article supplement (doi:10.1186/s12913-023-10359-0), 2023-12-15
Supplement: MOESM1 [file 26533514]

**A cross sectional study investigating the feasibility of identifying children under five at risk of TB in Gauteng Province, South Africa**

**SL02 FACILITY MANAGER QUESTIONNAIRE**

**SECTION 1: TO BE FILLED IN BEFORE VISIT**

|                                                            |  |
|------------------------------------------------------------|--|
| 1. Site number                                             |  |
| 2. Date of assessment                                      |  |
| 3. Person conducting the assessment                        |  |
| 4. Initial and Job title of person responding to questions |  |

**5. From the routine data complete the table for the last 12 months, children seen in this clinic (*indicate which months*)**

|    | Mth/yr | Total number children under five seen | Total number children under five screened for TB | Total number children under five eligible for IPT | Total number children under five initiated on IPT | Total number children under five completed IPT | Total number children under five diagnosed with TB |
|----|--------|---------------------------------------|--------------------------------------------------|---------------------------------------------------|---------------------------------------------------|------------------------------------------------|----------------------------------------------------|
|    | A      | B                                     | C                                                | D                                                 | E                                                 | F                                              | G                                                  |
| 1  |        |                                       |                                                  |                                                   |                                                   |                                                |                                                    |
| 2  |        |                                       |                                                  |                                                   |                                                   |                                                |                                                    |
| 3  |        |                                       |                                                  |                                                   |                                                   |                                                |                                                    |
| 4  |        |                                       |                                                  |                                                   |                                                   |                                                |                                                    |
| 5  |        |                                       |                                                  |                                                   |                                                   |                                                |                                                    |
| 6  |        |                                       |                                                  |                                                   |                                                   |                                                |                                                    |
| 7  |        |                                       |                                                  |                                                   |                                                   |                                                |                                                    |
| 8  |        |                                       |                                                  |                                                   |                                                   |                                                |                                                    |
| 9  |        |                                       |                                                  |                                                   |                                                   |                                                |                                                    |
| 10 |        |                                       |                                                  |                                                   |                                                   |                                                |                                                    |
| 11 |        |                                       |                                                  |                                                   |                                                   |                                                |                                                    |
| 12 |        |                                       |                                                  |                                                   |                                                   |                                                |                                                    |

If no children – tick here

Protocol: Seeking under-fives for TB Study AUR 2-7-229  
 Version 3.0: 14 May 2018  
 Principal Investigator Name: Dr Candice M Chetty-Makkan  
 Approved by: Wits HREC  
 Date Approved: Pending

**Availability of staffing**

| 6. Indicate numbers <u>Full time staff</u> of each category providing <u>TB services to children under five</u> in this facility (fill in only the appropriate line) . Please can you indicate number of FTEs per area. |                |                                         |                                         |                                                                         |                           |
|-------------------------------------------------------------------------------------------------------------------------------------------------------------------------------------------------------------------------|----------------|-----------------------------------------|-----------------------------------------|-------------------------------------------------------------------------|---------------------------|
| Category                                                                                                                                                                                                                | A. No of staff | B. No of staff that see adult patients? | C. No of staff that see child patients? | D. FTE<br>1 day/week = 0.2<br>2 days/week = 0.4<br>Half days 5xwk = 0.5 | E. Full Time or Part Time |
| 1. Site manager (if not doctor or nurse                                                                                                                                                                                 |                |                                         |                                         |                                                                         |                           |
| 2. Doctors                                                                                                                                                                                                              |                |                                         |                                         |                                                                         |                           |
| 3. Professional nurses                                                                                                                                                                                                  |                |                                         |                                         |                                                                         |                           |
| 4. Enrolled nurses                                                                                                                                                                                                      |                |                                         |                                         |                                                                         |                           |
| 5. Enrolled nursing assistants                                                                                                                                                                                          |                |                                         |                                         |                                                                         |                           |
| 6. Lay counsellors                                                                                                                                                                                                      |                |                                         |                                         |                                                                         |                           |
| 7. Pharmacist                                                                                                                                                                                                           |                |                                         |                                         |                                                                         |                           |
| 8. Pharmacy assistant                                                                                                                                                                                                   |                |                                         |                                         |                                                                         |                           |
| 9. Dietician                                                                                                                                                                                                            |                |                                         |                                         |                                                                         |                           |
| 10. Social worker                                                                                                                                                                                                       |                |                                         |                                         |                                                                         |                           |
| 11. Psychologist                                                                                                                                                                                                        |                |                                         |                                         |                                                                         |                           |
| 12. Clerical staff/data capturers                                                                                                                                                                                       |                |                                         |                                         |                                                                         |                           |
| 13. Other: specify.....                                                                                                                                                                                                 |                |                                         |                                         |                                                                         |                           |

**Staff turnover and unfilled posts**

- 7. No of vacancies (budgeted but not in place) currently in this facility? .....
- 8. How many staff members have left this facility in the past year? .....
- 9. How many new staff members in the past year? .....

Protocol: Seeking under-fives for TB Study AUR 2-7-229  
 Version 3.0: 14 May 2018  
 Principal Investigator Name: Dr Candice M Chetty-Makkan  
 Approved by: Wits HREC  
 Date Approved: Pending

**10. Indicate numbers of people left and came to this facility in the past year?**

| Category                          | A. No of staff left | B. No of staff joined |
|-----------------------------------|---------------------|-----------------------|
| 1. Site manager                   |                     |                       |
| 2. Doctors                        |                     |                       |
| 3. Professional nurses            |                     |                       |
| 4. Enrolled nurses                |                     |                       |
| 5. Enrolled nursing assistants    |                     |                       |
| 6. Lay counsellors                |                     |                       |
| 7. Pharmacist                     |                     |                       |
| 8. Pharmacy assistant             |                     |                       |
| 9. Dietician                      |                     |                       |
| 10. Social worker                 |                     |                       |
| 11. Psychologist                  |                     |                       |
| 12. Clerical staff/data capturers |                     |                       |
| 13. Others: specify.....          |                     |                       |

**Availability of essential services**

**11. Is the facility able to provide the following services? (fill in every line)**

| Service                           | A. Available Yes=1 No=0 | B. No of days per week available |
|-----------------------------------|-------------------------|----------------------------------|
| 1. HCT                            |                         |                                  |
| 2. PMTCT                          |                         |                                  |
| 3. HIV wellness service           |                         |                                  |
| 4. ART initiation                 |                         |                                  |
| 5. ART follow-up/maintenance      |                         |                                  |
| 6. Curative care (minor ailments) |                         |                                  |
| 7. Antenatal care                 |                         |                                  |
| 8. Obstetric deliveries           |                         |                                  |
| 9. TB treatment                   |                         |                                  |
| 10. Chronic disease care          |                         |                                  |
| 11. Post sexual assault services  |                         |                                  |
| 12. Home based care               |                         |                                  |
| 13. Support for obtaining grants  |                         |                                  |
| 14. On-site pharmacy              |                         |                                  |
| 15. TB sputum microscopy          |                         |                                  |
| 16. TB sputum culture             |                         |                                  |

Protocol: Seeking under-fives for TB Study AUR 2-7-229  
 Version 3.0: 14 May 2018  
 Principal Investigator Name: Dr Candice M Chetty-Makkan  
 Approved by: Wits HREC  
 Date Approved: Pending

|                                          |  |  |
|------------------------------------------|--|--|
| 17. X-ray facilities                     |  |  |
| 18. Immunization                         |  |  |
| 19. Feeding support (eg. Breast-feeding) |  |  |
| 20. Antenatal classes                    |  |  |

**12. Regarding your opening hours at this facility, indicate when open and when patients need to arrive to be seen by a doctor on the same day and have bloods taken on that day.**

|                    | A. From<br>[00:00] | B. To<br>[00:00] | C. Bloods on the<br>same day<br>(Time 00:00) | D. Seen by doctor on<br>the same day<br>(Time 00:00) |
|--------------------|--------------------|------------------|----------------------------------------------|------------------------------------------------------|
| 1. Monday          |                    |                  |                                              |                                                      |
| 2. Tuesday         |                    |                  |                                              |                                                      |
| 3. Wednesday       |                    |                  |                                              |                                                      |
| 4. Thursday        |                    |                  |                                              |                                                      |
| 5. Friday          |                    |                  |                                              |                                                      |
| 6. Saturday        |                    |                  |                                              |                                                      |
| 7. Sunday          |                    |                  |                                              |                                                      |
| 8. Public Holidays |                    |                  |                                              |                                                      |

**13. Do you see patients who arrive without an appointment? 1=Yes, 0=No**

**14. If yes, please list the services for which you see patients without an appointment**

.....  
 .....  
 .....

**Other information**

.....  
 .....  
 .....  
 .....  
 .....

Protocol: Seeking under-fives for TB Study AUR 2-7-229  
 Version 3.0: 14 May 2018  
 Principal Investigator Name: Dr Candice M Chetty-Makkan  
 Approved by: Wits HREC  
 Date Approved: Pending

**SECTION 2: INTERVIEW**

**Pathways of care**

**(ask the clinic manager to relate to you what happens in each of these circumstances)**

| <b>15. What normally happens when a person attending this clinic is suspected of having TB or requests a TB test?</b> |     |    |
|-----------------------------------------------------------------------------------------------------------------------|-----|----|
| Where do they receive TB screening?                                                                                   |     |    |
| If you suspect TB what do you do and where do they go?                                                                |     |    |
| What TB investigations take place?                                                                                    |     |    |
| If confirmed of TB, what happens next?                                                                                |     |    |
| What contact tracing procedures (if any) are followed in the facility?                                                |     |    |
| Where do your TB patients most commonly come from? (e.g. referred after admission, from general OPD, ANC,HCT)         |     |    |
| Pathways of care elaborated/available in writing                                                                      | Yes | No |

**Referral and integration**

| <b>16. If you don't offer this service, how would you describe your relationship with the following services?</b> |                                       |               |
|-------------------------------------------------------------------------------------------------------------------|---------------------------------------|---------------|
| <b>Service</b>                                                                                                    | <b>Good=1 Fair =2 Poor=3<br/>4=NA</b> | <b>Detail</b> |
| a) HIV testing                                                                                                    |                                       |               |
| b) TB Treatment                                                                                                   |                                       |               |
| c) PMTCT/antenatal Care                                                                                           |                                       |               |
| d) Referral hospital                                                                                              |                                       |               |
| e) Obstetrics                                                                                                     |                                       |               |

Protocol: Seeking under-fives for TB Study AUR 2-7-229  
 Version 3.0: 14 May 2018  
 Principal Investigator Name: Dr Candice M Chetty-Makkan  
 Approved by: Wits HREC  
 Date Approved: Pending

**17. Have you ever referred a patient to, or had contact with, the following providers?**

| Provider                                            | Referred only=1<br>Contacted only =2<br>Referred and contacted =3 Never =0 | Details |
|-----------------------------------------------------|----------------------------------------------------------------------------|---------|
| a) A traditional healer                             |                                                                            |         |
| b) Another private clinic or private GP             |                                                                            |         |
| c) A community organisation                         |                                                                            |         |
| d) Social workers/ Department of Social Development |                                                                            |         |
| e) Schools/education dept                           |                                                                            |         |
| f) Birthing Assistant/Mid-wife                      |                                                                            |         |

**Adherence management**

**18. I'd now like to ask you how you manage treatment preparation, adherence and tracking of IPT patients who don't attend follow-up appointments**

| Step/procedure | Description                                                                                            |
|----------------|--------------------------------------------------------------------------------------------------------|
|                | Describe the steps (verbal or written) or procedures involved in preparing children under five for IPT |
|                |                                                                                                        |
|                | Describe how you ensure that children under five remain on (adhere to) IPT?                            |
|                |                                                                                                        |
|                | How do you monitor IPT in individual children under five?                                              |
|                |                                                                                                        |
|                | How do you track defaulters from the service?                                                          |
|                |                                                                                                        |

Protocol: Seeking under-fives for TB Study AUR 2-7-229  
 Version 3.0: 14 May 2018  
 Principal Investigator Name: Dr Candice M Chetty-Makkan  
 Approved by: Wits HREC  
 Date Approved: Pending

**19. Appointments are made for patients attending follow-up TB services**

|                                                                       | Yes=1 No=0 |
|-----------------------------------------------------------------------|------------|
| 1. For return dates                                                   |            |
| 2. For return dates and times                                         |            |
| 3. Patients can request appointment changes if dates don't suit them. |            |

**20. Have there been any changes in the site in the past 3 years:**

|                      | Yes=1 No=0 | Details |
|----------------------|------------|---------|
| 1. Management        |            |         |
| 2. Staff members     |            |         |
| 3. Facilities        |            |         |
| 4. Services provided |            |         |
| 5. Types of patients |            |         |

**21. What are the biggest challenges facing you as manager of this facility?**

.....

.....

.....

.....

.....

.....

**22. What are the biggest challenges facing your staff in this facility?**

.....

.....

Protocol: Seeking under-fives for TB Study AUR 2-7-229  
 Version 3.0: 14 May 2018  
 Principal Investigator Name: Dr Candice M Chetty-Makkan  
 Approved by: Wits HREC  
 Date Approved: Pending

.....

.....

.....

.....

**23. What are the challenges in delivering TB services in this facility?**

.....

.....

.....

.....

.....

.....

.....

.....

**24. What are your experiences of delivering TB services to children under five in this facility?**

.....

.....

.....

.....

.....

.....

.....

| COMPLETED | VERIFIED | Date                  | Any comments |
|-----------|----------|-----------------------|--------------|
| _ _       | _ _      | _ _ / _ _ _ _ /20 _ _ |              |

Protocol: Seeking under-fives for TB Study AUR 2-7-229  
 Version 3.0: 14 May 2018  
 Principal Investigator Name: Dr Candice M Chetty-Makkan  
 Approved by: Wits HREC  
 Date Approved: Pending
